1 **TITLE PAGE**

2

3 **Title:**

4 Transcriptional dynamics of transposable elements in the type I IFN response in *Myotis*

5 *lucifugus* cells

6

7 **Authors:**

8 Giulia Irene Maria Pasquesi<sup>1</sup>, Conor J. Kelly<sup>1</sup>, Andrea D. Ordonez<sup>1</sup> and Edward B. Chuong<sup>1\*</sup>

9

10 **§ Corresponding author:**

11 Edward B. Chuong

12 edward.chuong@colorado.edu

13 596 UCB Boulder, CO 80309 303-735-8573

14

15 **Affiliation:**

16 **1** BioFrontiers Institute and Department of Molecular, Cellular & Developmental Biology,

17 University of Colorado Boulder

18

19 **Keywords:** bat immunity, transposable elements, epigenomics

20

21 **Running Title:** IFN-inducible transposons in *Myotis* cells

22

23 **ABSTRACT**

24 **Background:** Bats are a major reservoir of zoonotic viruses, and there has been growing  
25 interest in characterizing bat-specific features of innate immunity and inflammation. Recent  
26 studies have revealed bat-specific adaptations affecting interferon (IFN) signaling and IFN-  
27 stimulated genes (ISGs), but we still have a limited understanding of the genetic mechanisms  
28 that have shaped the evolution of bat immunity. Here we investigated the transcriptional and  
29 epigenetic dynamics of transposable elements (TEs) during the type I IFN response in little  
30 brown bat (*Myotis lucifugus*) primary embryonic fibroblast cells, using RNA-seq and CUT&RUN.

31 **Results:** We found multiple bat-specific TEs that undergo both locus-specific and family-level  
32 transcriptional induction in response to IFN. Our transcriptome reassembly identified multiple  
33 ISGs that have acquired novel exons from bat-specific TEs, including *NLRC5*, *SLNF5* and a  
34 previously unannotated isoform of the *IFITM2* gene. We also identified examples of TE-derived  
35 regulatory elements, but did not find strong evidence supporting genome-wide epigenetic  
36 activation of TEs in response to IFN.

37 **Conclusion:** Collectively, our study uncovers numerous TE-derived transcripts, proteins, and  
38 alternative isoforms that are induced by IFN in *Myotis lucifugus* cells, highlighting candidate loci  
39 that may contribute to bat-specific immune function.

40

41 **KEYWORDS:** bat immunity, transposable elements, epigenomics

42

43 **BACKGROUND**

44 Bats are increasingly recognized to be an important reservoir of zoonotic viruses, including  
45 Rabies viruses, Dengue viruses, Ebolaviruses, and Coronaviruses [1,2]. Remarkably, viral  
46 infection in bats is associated with minimal lethality and reduced inflammatory phenotypes,

47 which has led to extensive research aimed at uncovering bat-specific features of immunity [3–  
48 6].

49  
50 Recent genomic and functional studies in bats have begun to reveal species-specific  
51 adaptations affecting innate immune responses. For example, the interferon (IFN) genes have  
52 been subject to evolutionary expansions and contractions in different bat species, and several  
53 species exhibit constitutive expression of IFNs at low levels [7] (reviewed in [1]). Bats also exhibit  
54 unique subsets of ISGs [8]. A time-course analysis comparing the type I IFN response in  
55 *Pteropus alecto* and humans revealed distinct kinetics of IFN-stimulated gene (ISG) regulation,  
56 where bats exhibit more rapid downregulation of ISGs compared to humans [9]. In addition to  
57 adaptations affecting IFN signaling, other pro-inflammatory genes are also frequently mutated or  
58 lost, including TLR genes [10], components of the inflammasome [11,12], the cGAS/STING  
59 pathway [13], and the OAS/RNASEL pathway [9,14]. These studies have begun to reveal the  
60 genetic basis for bat-specific features of immunity which could help us understand their  
61 propensity to act as viral reservoirs.

62  
63 While it is clear that bats have evolved numerous unique adaptations affecting innate immune  
64 pathways, we still have a poor understanding of the genetic mechanisms responsible for these  
65 changes. Our study focuses on TEs as a potentially important yet understudied source of  
66 mutations that shape bat immunity. In studies of other mammalian lineages, there is evidence  
67 that lineage-specific TEs contribute to innate immune functions through a variety of  
68 mechanisms. For example, TE and virus-derived proteins have been repeatedly co-opted as  
69 immune proteins that often restrict viruses through dominant negative activity [15] in ruminants  
70 [16], rodents [17], and primates [18]. TE-derived non-coding transcripts can readily form  
71 immunostimulatory double-strand RNAs or DNAs [19–21]. Finally, TEs can regulate interferon-

72 inducible gene expression by acting as regulatory elements [22–26]. The recurrent co-option of  
73 TEs for immune functions throughout evolution may reflect their capacity to fuel adaptation by  
74 increasing genomic variation, especially in the context of host-pathogen coevolutionary arms  
75 races [27,28].

76

77 TEs are widely speculated to have been important contributors to the evolution of bats [29–33],  
78 including bat-specific immune functions [34,35]. While the genomes of all mammalian species  
79 contain numerous lineage-specific transposons, bat genomes are distinguished by recently  
80 active DNA transposons, which are extinct in most other mammalian lineages [29–32]. In  
81 addition to DNA transposons, bat genomes have been extensively shaped by other TEs  
82 typically found in other mammals, including LTR retrotransposons like endogenous retroviruses,  
83 LINEs, and SINEs. Notably, a recent report identified a *Rhinolophus*-specific LTR insertion  
84 within an exon of *OAS1*, which disrupts horseshoe bat antiviral activity to SARS-CoV2 with  
85 significant implications for the *OAS1*-mediated response to SARS-CoV2 in humans [14].  
86 However, aside from this example, the potential impact of TEs on bat immunity remains largely  
87 unstudied, due to the lack of experimental and functional genomic resources available for  
88 studying bat immunology.

89

90 To conduct a comprehensive genome-wide study of TEs in bat innate immunity, we conducted  
91 transcriptomic and epigenomic profiling of the type I IFN response in *Myotis lucifugus* primary  
92 fibroblast cells. We used RNA-seq and CUT&RUN to characterize the IFN-inducible  
93 transcriptomes and regulatory elements, which allowed us to systematically examine the  
94 contribution of TEs to loci that define the bat IFN-inducible response.

95

96 **RESULTS**

97 To characterize the contribution of TEs to the IFN response in bats, we conducted  
98 transcriptomic and epigenomic profiling of the type I IFN response in *M. lucifugus* primary  
99 embryonic fibroblast cells (Fig. 1). We stimulated cells using recombinant universal IFN alpha  
100 (IFN $\alpha$ ), and profiled the transcriptome at 0, 4 and 24h time points using RNA-seq. We confirmed  
101 cellular response to universal IFN treatment using qPCR on canonical ISGs (Fig. S1), as shown  
102 previously for *M. lucifugus* dermal fibroblasts [8]. We also profiled 0 and 4h time points using  
103 CUT&RUN to map genome-wide localization of H3K27ac, POLR2A, and STAT1. We aligned  
104 these data to a chromosome-scale HiC assembly of the little brown bat genome  
105 (myoLuc2.0\_HiC) [36], which was the most contiguous assembly available (Scaffold N50 of  
106 ~95.5Mb).

107  
108 Prior to analyzing our functional genomic data, we performed de-novo repeat identification on  
109 the myoLuc2.0\_HiC assembly using RepeatModeler2 [37–39]) and HelitronScanner ([37–39],  
110 followed by repeat annotation using RepeatMasker [40]. We annotated 42.7% of the genome as  
111 derived from TEs, compared to 35.5% annotated in the myoLuc2 non-HiC assembly  
112 (<https://www.repeatmasker.org/species/myoLuc.html>). L1 LINEs represent the most abundant  
113 TE group (14.1%), followed by virus-derived elements (ERVs; 5.6%) and DNA hAT and Helitron  
114 elements (3.7% and 3.2% of the genome, respectively) (Fig. 2A). As previously identified [29],  
115 our analyses show the lineage-specific expansion of DNA transposons, first led by Helitron  
116 elements, and more recently by multiple subfamilies of hAT elements that may have been  
117 introduced by horizontal transfer (Fig. 2A) [41].

118  
119 *Gene and TE expression profiles upon IFN stimulation*

120 To analyze transcriptional activity at the TE family level, we mapped RNA-seq reads to both  
121 genes and TE families using TETranscripts (Fig. 2B) [42]. On average, 6.38% of RNA-seq reads

122 mapped to TEs in unstimulated cells, while 7.26% of reads mapped to TEs after 4h IFN  
123 treatment, and 7.15% after 24h IFN treatment. The most abundant TE-derived transcripts we  
124 identified included L1 LINEs, DNA/hAT elements, ERVs, SINEs and L2 LINEs. We identified 45  
125 TEs that showed significant family-level transcriptional induction at 4h (adj.  $p$ -val < 0.05; log2FC  
126 > 1.5), and 8 families induced at 24h according to the same cutoff thresholds (Fig. 2C). These  
127 included multiple ERV families (21), L1 LINEs (6) and DNA transposons (6) at 4h post  
128 treatment, and ERVs (5) at 24h post IFN treatment. These findings indicate that multiple bat-  
129 specific TEs show family-level transcriptional induction in response to IFN treatment, peaking at  
130 4h and diminishing but still present at 24h post induction.

131  
132 We next analyzed our RNA-seq dataset to identify IFN-stimulated genes (ISGs), as determined  
133 by DESeq2 comparing gene counts from treated to untreated samples in pairwise comparisons  
134 at 4h and at 24h post treatment (Tables S1 and S2). We first used the homology-based  
135 annotation provided by DNazoo as a reference transcriptome. Using a cutoff of adj.  $p$ -val < 0.05  
136 and log2FC > 1.5, we identified 213 upregulated transcripts (corresponding to 138 unique  
137 genes) and 1 downregulated gene at 4h, and 91 upregulated transcripts (corresponding to 66  
138 unique genes) at 24h post IFN stimulation. Based on their expression dynamics, 4 main  
139 transcript clusters were identified (Fig. 3A): I) transcripts showing a strong response to IFN at 4h  
140 that declines at 24h; II) transcripts showing mild induction at 4h and decline at 24h; III)  
141 transcripts showing mild, stable induction; and IV) transcripts showing strong induction at 4h  
142 and rapid decline to levels similar to unstimulated cells at 24h. Both 4h and 24h post-induction  
143 ISGs were enriched for canonical ISGs and other genes involved in immune signaling (Fig. 3B).  
144 Notably, we observed induction of genes involved in DDX58/IFIH1 (RIG-I/MDA5)-mediated  
145 induction of IFNa/b at 4h, followed by induction of negative regulators of this pathway at 24h  
146 (Fig. 3B). Similarly, an enrichment for genes involved in response to cytokine stimuli was  
147 detected at 4h but not at 24h post treatment. These observations of a strong early response

148 followed by a decline by 24h upon IFN stimulation are consistent with observations in the black  
149 flying fox (*Pteropus alecto*) [9].

150

### 151 *TE contribution to ISG transcript structure*

152 To improve detection of potentially unannotated IFN-induced TE-derived transcripts and  
153 isoforms, we conducted genome-guided transcriptome reassembly on our combined RNA-seq  
154 dataset using StringTie2 [43] (Supplementary Data 1), and annotated assembled genes based  
155 on homology using the SwissProt database. This yielded an expanded transcriptome with  
156 68,110 transcripts (32,137 transcripts matching an annotated gene). After performing pairwise  
157 differential expression analyses (Table S3) we identified 1243 IFN-inducible transcripts  
158 corresponding to 836 StringTie genes (740 IFN-inducible transcripts corresponding to 449  
159 StringTie genes matching Swissprot) at 4h, and 717 transcripts corresponding to 500 StringTie  
160 genes (385 transcripts, 239 matching Swissprot) at 24h. Of these, 606 transcripts corresponding  
161 to 392 genes (358 transcripts, 214 genes matching Swissprot) were shared between 4h and  
162 24h treatment time.

163

164 We used our improved transcriptome reassembly to investigate the contribution of TEs to both  
165 constitutive and IFN-inducible transcript structures. First, we identified transcripts that contained  
166 exonized TEs based on the overlap of exon (>50% sequence length) and annotated TE  
167 features. Considering all expressed (TPM  $\geq$  0.5) multi-exon transcripts, we found a subset of  
168 1039 transcripts corresponding to 749 StringTie genes (648 transcripts and 470 genes with  
169 homology to annotated genes in the SwissProt database) that contained at least one TE-derived  
170 exon (Table S4).

171

172 Focusing first on transcripts reconstructed from constitutively expressed genes, we identified  
173 *EEF1A1* as an example where 271 bp (representing part of the third and fourth exons; coding  
174 exons 2 and 3) is annotated as derived from a Zisupton DNA transposon. Since Zisupton DNA  
175 elements have likely been lost during the tetrapoda radiation [44], and their presence and  
176 activity has been confirmed only in fish species among vertebrates, we further verified this  
177 finding through multiple BLAST searches (Supplementary Data 2). First, we aligned the StingTie  
178 transcript (STRG.21546.2, Scaffold 10: 12654609-12761039) to the transcript sequence  
179 deposited on the NCBI database (XM\_006089332.3). After confirming the match between the  
180 two transcripts, we used the deposited mRNA sequence as a query against the Repbase  
181 transposable element database [45] and against bats and mammalian mRNA collections. All  
182 *Microchiroptera*, *Vespertilionidae* in particular, share highly homologous coding exons 3 and 4  
183 (Supplementary Data 3), suggesting that the exonization event occurred before or during the  
184 *Microchiroptera* and *Pteropodinae* radiation. Despite the shared homology, no Zisupton  
185 matching features were found in the human or other euarchonta *EEF1A1* homologues.  
186 Therefore, our analysis successfully identified bat *EEF1A1* as an example of a gene that has  
187 likely been altered by a bat-specific TE.  
188 We next filtered for IFN-inducible transcripts containing TE-derived exon(s), and found 44  
189 transcripts from 34 genes (16 of which annotated by SwissProt homology) induced at 4h, and  
190 31 transcripts from 24 genes (11 annotated) induced at 24h (Table S4). These included genes  
191 with established roles in immune responses, like *PARP9*, *SLFN5* (Fig. S2A) and a candidate  
192 novel isoform of *IFITM2* that has not been previously identified (Fig. S2B). This analysis reveals  
193 that numerous constitutively expressed and IFN-inducible genes have acquired exons from bat-  
194 specific TEs either in coding regions or UTRs (Table 1).  
195  
196



197 We next aimed to identify potential examples of co-opted TE-derived proteins (such as  
198 syncytins; [46]) which may not be masked by RepeatMasker due to their age. We used *tblastx*  
199 to query expressed StringTie transcripts against reference TE protein sequence libraries  
200 specific for retrotransposons and DNA elements (see Methods). We found a total of 7 StringTie  
201 genes with a known annotated ortholog based on the concatenated StringTie transcriptome  
202 assembly, and 156 StringTie genes based on intact ORF prediction (Table S5; Methods). By  
203 using the intact ORF prediction approach we identified 9 ISGs (i.e., *GBP1*, *DDX58* and  
204 *PARP14*) with at least one retrotransposon-derived feature, mostly from ERVK and L1 LINEs.  
205 Most of these TE-derived sequences reside in the last exon, where they provide both the stop  
206 codon and the 3'UTR, or novel coding and/or regulatory sequences. Finally we followed the  
207 same approach to identify novel protein-coding sequences matching known viral proteins that  
208 could represent domesticated viral proteins [47]. By leveraging the gEVE and a custom syncytin  
209 protein database we found a total of 3 constitutively expressed StringTie genes with homology  
210 to syncytin proteins and 9 with homology to either a pol, gag, retrotransposase or AP viral  
211 proteins (Table S6). Only one pol (RVT1)-derived gene, *UBP18*, was differentially expressed  
212 upon IFN treatment .

213  
214 In addition to examining the TE contribution to protein-coding sequences, we also searched for  
215 examples of TE-derived promoters. We collapsed StringTie transcript coordinates to their  
216 transcription start site (TSS), and intersected transcript TSSs with the generated TE annotation.  
217 We identified a total of 11 transcripts with a TSS deriving from a TE that are IFN-inducible at 4h,  
218 9 of which are shared with the 24h subset (Table S7). Most of these belong to genes known to  
219 be involved in immune function and regulation, like *NLRC5* (Fig. 4), *EIF2AK2*, *GBP1*, *MX1*,  
220 *MX2*, *PHF11*, *SAMD9* and *XAF1*, while others like *PARP14* and *CS012* are not canonical ISGs.  
221 Notably, we also observed recurrent usage of TE-derived promoters for histocompatibility loci  
222 located in Scaffolds 13 and 20, where 78 transcripts (corresponding to 21 annotated genes) at

223 4h and 7 transcripts (corresponding to 3 annotated genes) at 24h have TE-derived TSSs or  
224 coding exons. While the histocompatibility locus may be prone to sequence assembly artifacts  
225 related to its highly polymorphic and complex structure, our analysis suggests that TEs may  
226 have influenced the evolution of the bat histocompatibility locus, which has been proposed to  
227 underlie bat-specific immune function [48,49].

228

### 229 *Epigenetic profiling upon IFN stimulation*

230 Having analyzed the contribution of TEs to ISGs, we next asked how TEs contribute to inducible  
231 regulatory elements defined by H3K27ac, POLR2A, or STAT1 activity in response to IFN. We  
232 observed an increase in STAT1 signal at the predicted promoters for *IRF9* and *PSME2* in  
233 response to type I IFN (Fig. 5A). Using spike-in normalized CUT&RUN data at 0 and 4h, we  
234 used DESeq2 to define IFN-inducible regulatory elements, as performed previously [22].

235 Unexpectedly, we did not observe robust IFN-inducible chromatin changes that are  
236 characteristic of IFN-stimulated cells from other species [22,50]. We did not identify any  
237 H3K27ac inducible elements with an FDR < 0.05 (Fig. 5B; Table S8), and instead defined a set  
238 of 1113 elements showing an increase of H3K27ac signal with a relaxed significance threshold  
239 of unadjusted  $p\text{-val} < 0.1$  (Fig. S3A). This set of IFN-inducible elements was enriched for  
240 interferon-stimulated response element (ISRE) motifs (E-value  $1.43 \times 10^{-10}$ ) (Table S9), consistent  
241 with their activation by IFN stimulation. Thus, while our CUT&RUN analysis successfully  
242 identified some elements showing IFN-inducible activity, our analysis reveals surprisingly  
243 modest chromatin-level changes, despite robust ISG induction according to RT-qPCR from RNA  
244 taken from the same fraction of cells (Fig. S1).

245

246 Of these regions, we found that 466 out of 1113 fully overlapped at least one TE (Table S10).

247 Additionally, we identified 766 inducible, STAT1-bound TEs that fall within 100kb of an ISG

248 (Table S11). This includes an LTR14\_ML element that may be functioning as the promoter for  
249 the *NLRC5* locus in addition to an intronic Ves2\_ML SINE element (Fig. 4). However, in contrast  
250 to previous studies in other species [22–26], we did not observe any overrepresented TE  
251 families within this set (Fig. S3B; Table S12). The only subfamilies that overlapped more than  
252 10 IFN-inducible H3K27ac regions correspond to the ancient mammalian MIR and L2 families  
253 that predate the evolution of bats (Fig. 5C; Fig. S3C). Querying H3K27ac regions from either  
254 untreated or IFN-stimulated conditions independently, we observed only very modest  
255 enrichment of the MIR3, AmnSINE1, and LTR13C\_ML families (Fig. 5D; Fig. S4A, S4B). Taken  
256 together, our analysis indicates that TEs contribute to hundreds of regulatory elements involved  
257 in IFN signaling, but in contrast to studies in other species, we did not identify enrichment of  
258 lineage-specific TE families within IFN-inducible regulatory elements. However, given that our  
259 CUT&RUN analysis revealed a relatively minimal set of inducible regulatory elements at a  
260 genome-wide level, we were limited in our ability to identify enriched TE families.

261

## 262 **DISCUSSION**

263 Our study characterizes the transcriptional and epigenetic dynamics of bat TEs in the IFN  
264 response in *M. lucifugus* cells. To facilitate our ability to map TEs in our functional genomic  
265 data, we conducted both RNA-seq and CUT&RUN using 150bp paired end reads, and  
266 generated an improved repeat annotation using a chromosome-scale assembly. Our analyses  
267 revealed that TEs have shaped the IFN-inducible transcriptome, but we did not find strong  
268 evidence for a global role for TEs in shaping associated epigenetic changes. Functional studies  
269 will be necessary to validate whether any of the elements identified in this study have  
270 significance for bat immunity, but given the growing number of validated examples in human  
271 and mouse, it is likely that some TEs have been co-opted for innate immune function in bats.

272

273 For our study, we generated a matched transcriptomic and epigenomic datasets profiling the  
274 type I IFN response in *M. lucifugus* primary cells. Our transcriptomic analysis of the IFN  
275 response in *M. lucifugus* embryonic fibroblasts confirms previously reported features of bat  
276 innate immunity. We found that these cells respond to IFN stimulation at the transcriptional  
277 level, with a stronger and broad induction of ISGs at earlier time points (4 hours post treatment).  
278 We also found that only a small subset of genes that were overexpressed at 4h maintain high  
279 expression levels at 24h, whereas most genes show a reduction in expression to lower levels or  
280 levels similar to those recorded in unstimulated cells. This is in agreement with gene expression  
281 profiling in *Pteropus alecto* [9]. In parallel to gene expression, we characterized expression  
282 profiles of TE-derived transcripts, and found similar trends. Total TE expression was higher at  
283 4h post IFN treatment, with more and more diverse TE families being differentially expressed  
284 both in comparison to unstimulated and 24h cells. While the expression of these transcripts is  
285 not directly indicative of function, IFN-inducible expression of bat-specific TE families may act as  
286 a source of non-coding transcripts that can further activate innate immune pathways, akin to the  
287 “viral mimicry” pathway characterized in human cancers [19,20].

288  
289 We also explored whether specific TEs may have affected the transcript structure of host genes,  
290 by screening for gene transcripts that share homology with transposable elements or viral  
291 proteins in coding regions and transcription start sites (TSS). Our genome-guided transcriptome  
292 assembly identified multiple instances of TE-derived and viral protein-derived exonization  
293 events, both as alternative (*IFITM2*) or conserved (*PARP9*) exons and TSS (*NLRC5*). Some of  
294 these transcripts represent canonical (*PARP9*, *DDX60*) or non-canonical (*PLAAT3*, *SP140L*)  
295 ISGs. These analyses provide strong evidence that TEs have been co-opted into the exons of  
296 bat ISGs, and some of these exonization events may have significant functional consequences.  
297 For example, our analysis identified multiple *Myotis*-specific TE insertion and exonization events  
298 affecting the *NLRC5* gene. *NLRC5* has been identified as a key regulator of MHC class I-

299 dependent immune responses [51], and may be involved in the regulation of inflammasome  
300 activation and type I IFN responses [52]. Further studies are needed to validate the potential  
301 effects of these TE-derived sequences, but it is possible that *Myotis*-specific TEs have altered  
302 NLRC5 function and/or regulation.

303  
304 We also identified instances of TE-derived constitutively expressed genes. We verified through  
305 multiple BLAST and sequence alignments that the ~100 amino acids of the EEF1A1 protein of  
306 *Microchiroptera* and likely *Pteropodinae* bats derived from the exonization of a Zisupton DNA  
307 transposons. Although Zisupton DNA transposons are not abundant in the *M. lucifugus* genome  
308 (we recovered only one family present, with 174 copies), it is possible that they were  
309 horizontally transferred into bat genomes as has happened in multiple fish species [44]. Age  
310 analysis of Zisupton genomic copies suggests that they were likely recently introduced  
311 (divergence from consensus ~18), but were able to expand only for a short period of time (peak  
312 of divergence from the consensus sequence at 4-9), when other DNA elements have been  
313 active. This example uncovered by our analysis highlights the possibility that TEs have shaped  
314 other aspects of bat biology in addition to genes involved in immune function.

315  
316 While RNA-seq profiling has been applied by an increasing number of studies to profile bat  
317 immunity at the transcriptomic level, no study to date has characterized bat immunity at the  
318 epigenomic level. Unexpectedly, while our RNA-seq analysis of *M. lucifugus* cells coincided with  
319 strong transcriptional response to IFN treatment, we observed relatively modest chromatin  
320 changes based on CUT&RUN epigenomic profiling. This observation contrasts with robust  
321 chromatin changes typically observed in IFN-treated cells from other mammalian species  
322 [22,53,54]. As a result, we did not observe strong evidence supporting family-level TE regulatory  
323 induction as observed previously in other species such as human [50] and cow [22], partly due  
324 to the lack of clearly inducible elements at a genome-wide level.

325  
326 There are multiple potential explanations for our observation of a relatively modest IFN-inducible  
327 epigenetic response in bat cells. First, our study is one of the first to conduct CUT&RUN on bat  
328 cells, and the antibodies used in this study have not been fully validated in *M. lucifugus*.  
329 However, while the antibody used for STAT1 may exhibit poor recognition of bat ortholog,  
330 histones and POLR2A are highly conserved and expected to be targeted effectively by standard  
331 antibodies. Second, our study involved stimulating derived embryonic fibroblast cell culture with  
332 recombinant universal type I IFN. While these conditions nonetheless showed strong  
333 transcriptional induction of ISGs, it is possible that chromatin dynamics are different during  
334 endogenous activation of IFN responses *in vivo*.

335  
336 Finally, our observations may reflect a unique attribute of bat immunity, consistent with the idea  
337 that some bat species exhibit constitutive IFN expression [7,55]. Although the type I IFN locus of  
338 *M. lucifugus* is poorly characterized, we were able to annotate at least 11 uncharacterized  
339 genes that likely reflect the expansion by gene duplication of the IFNw cluster (Fig. S5) [56],  
340 whereas no IFNa genes were identified. Of the 11 IFNw paralogues, 5 showed evidence of  
341 constitutive low expression in unstimulated cells, and induction at 4h post treatment (Fig. S5).  
342 These observations suggest a scenario where *Myotis* epigenomes are “primed” due to  
343 constitutive expression of IFN, and may be capable of driving robust transcriptional activation  
344 without exhibiting epigenetic changes typically associated with inducible chromatin activity, such  
345 as increased H3K27ac or POLR2A levels.

## 346 347 **CONCLUSIONS**

348 Our study provides a first systematic investigation of the contribution by TEs to the bat type I  
349 IFN response. We uncover numerous examples of TE-derived transcripts, alternative exons,

350 and regulatory elements that shape the genomic response to IFN in *M. lucifugus*. Our study  
351 suggests that TEs in other bat lineages such as *Pteropus* and *Rhinolophus* may also shape  
352 IFN-inducible transcriptomes, which may motivate functional studies to determine their  
353 biological significance in the context of bat immunity. Our findings lend additional support for a  
354 widespread role for TE co-option in shaping the evolution of species-specific immune  
355 responses.

356

## 357 **METHODS**

### 358 *Transposable Element identification and analysis*

359 *Myotis lucifugus* genomic repeat elements were annotated according to homology-based and *de*  
360 *novo* identification approaches. Although repeat elements have been extensively annotated in  
361 bat species including *Myotis lucifugus*, we performed *de novo* TE identification using  
362 RepeatModeler2 (included in dfam-tetools-1.1) [37] and HelitronScanner v1.1 [38] to match the  
363 newly released, highly contiguous chromosome-level assembly of the little brown bat genome  
364 (myoLuc2\_HiC) [36,57,58]. Given their highly repetitive nature, TE loci are hard to assemble  
365 and often incomplete; therefore genome assemblies that rely on long read assembly strategies  
366 (i.e., HiC) [36,59] are better suited for capturing full length elements over contiguous  
367 chromosome-level scaffolds.

368

369 Briefly, we performed *de novo* TE identification using RepeatModeler and HelitronScanner, then  
370 combined the two libraries as a single little brown bat *de novo* library that was used for  
371 homology-based TE annotation using RepeatMasker v4.1.0 [40]. To maximize element  
372 identification we followed a custom multi-step mapping strategy [60] using multiple libraries as  
373 reference for the masking process in the following order: (i) bat specific repeats included in the  
374 Repbase library provided with RepeatMasker; (ii) a bat specific library provided by Dr. Cosby;

375 (iii) our *de novo* little brown bat library; (iv) the entire tetrapoda Repbase library provided with  
376 RepeatMasker [45].

377

### 378 *Cell lines and treatment*

379 *Myotis lucifugus* primary embryonic fibroblast cells were a gift from Mario Capecchi. Cells were  
380 grown at 37°C and 5% CO<sub>2</sub> and passaged in DMEM (ThermoFisher #10566016) supplemented  
381 with 10% FBS, 5% MEM nonessential amino acids, 100 U/mL Penicillin-Streptomycin, and 1  
382 mM sodium pyruvate. Cells were seeded into six-well plates at an optimized density of 2×10<sup>5</sup>  
383 cells per well in 2ml of culturing media (or 2×10<sup>6</sup> cells per 15 cm dish for CUT&RUN). The  
384 following day (or 48h for CUT&RUN) cells were treated with 1000U/ml of Universal Type I IFNα  
385 resuspended in DPBS (PBL Assay Science #11200) in 2ml of culturing media; control cells were  
386 treated with equivalent volume of DPBS in 2ml of media. At four hours and 24 hours post  
387 treatment cells were harvested for RNA extraction (four hours for CUT&RUN).

388

### 389 *RNA isolation and library preparation for RNA-seq*

390 Following media removal, cells were washed with 1ml of DPBS and detached by adding 400ul  
391 of 0.25% trypsin per well. Following a 10 minutes incubation at 37°C, trypsin was neutralized  
392 with 1.6ml of culturing media. Cell suspensions were transferred into 1.7ml tubes and pelleted  
393 by centrifugation at 300xg for 5 minutes. Cells were then lysed in 300ul of RNA lysis buffer  
394 (Zymo Research #R1060-1-50), and stored at -80°C until RNA extraction was performed using  
395 the Quick-RNA MiniPrep kit (Zymo Research #R1054), following manufacturer's instructions.

396

397 Total RNA samples for each time point and condition were prepared in three biological  
398 replicates as described above. A NanoDrop One spectrophotometer (Thermo Fisher Scientific)  
399 was used to determine RNA concentration and quality; all samples passed quality assessment.



400 PolyA enrichment and library preparation was performed using the KAPA mRNA HyperPrep Kit  
401 (Kapa Biosystems #8098115702) according to the manufacturer's protocols. Briefly, 500 ng of  
402 RNA was used as input, and single-index adapters (Kapa Biosystems #08005699001) were  
403 added at a final concentration of 10 nM. Purified, adapter-ligated library was amplified for a total  
404 of 11 cycles following the manufacturer's protocol. The final libraries were pooled and  
405 sequenced on an Illumina NovaSeq 6000 (University of Colorado Genomics Core) as 150bp  
406 paired-end reads.

407

#### 408 *CUT&RUN sample and library preparation*

409 CUT&RUN pulldowns were generated using a protocol from [61,62]. All buffers were prepared  
410 according to the "High Ca<sup>2+</sup>/Low Salt" section of the protocol using 0.04% digitonin (EMD  
411 Millipore #300410). 5×10<sup>6</sup> viable cells were used for each pulldown. The following antibodies  
412 were used: rabbit anti-mouse IgG (1:100, Abcam #ab46540), rabbit anti-H3K27me3 (1:100, Cell  
413 Signaling #9733), rabbit anti-H3K27ac (1:100, Millipore #MABE647), rabbit anti-pRPB1-Ser5  
414 (1:50, Cell Signaling #135235S), rabbit anti-STAT1 (1:100, Cohesion #3322), rabbit anti-  
415 pSTAT1-Ser727 (1:100, Active Motif #39634). pAG-MNase (prepared as in [61,62]) was added  
416 to each sample following primary antibody incubation at a final concentration of 700 ng/mL.  
417 Chromatin digestion, release, and extraction was carried out according to [61,62]. Yeast spike-in  
418 DNA (gift from Steven Henikoff) was added to the quenching ("1× STOP") buffer for a final  
419 concentration of 100 pg/mL. Pulldown success was determined by Qubit dsDNA High Sensitivity  
420 and TapeStation 4200 HSD5000 before proceeding with library preparation.

421

422 Libraries were generated using a modified protocol for use with the KAPA HyperPrep Kit.  
423 Briefly, the full volume of each pulldown (50 uL) was used to generate libraries according to the  
424 manufacturer's protocol with the following modifications. Freshly diluted 0.200 uM single-index

425 adapters (Kapa Biosystems #08005699001) were added to each library at a low concentration  
426 (9 nM) to minimize adapter dimer formation. Adapter-ligated libraries underwent a double-sided  
427 0.8X/1.0X cleanup with KAPA Pure Beads (Kapa Biosystems #07983280001). Purified, adapter-  
428 ligated libraries were amplified using the following PCR cycling conditions: 45 s at 98°C, 15x(15  
429 s at 98°C, 10 s at 60°C), 60 s at 72°C. Amplified libraries underwent a double-sided 0.8X/1.0X  
430 cleanup. The final libraries were quantified using Qubit dsDNA High Sensitivity and TapeStation  
431 4200 HSD5000. Libraries were pooled and sequenced on an Illumina NovaSeq 6000  
432 (Novogene) as 150bp paired-end reads.

433

#### 434 *Paired RT-qPCR*

435  $5 \times 10^5$  viable cells from the same CUT&RUN populations (untreated and 4h IFN) were used to  
436 extract RNA for RT-qPCR analysis to confirm induction of IFN-inducible genes prior to  
437 CUT&RUN library preparation. Cells were lysed in 300ul of RNA lysis buffer (Zymo Research,  
438 #R1060-1-50). Prepared lysates were stored at -80°C until RNA extraction was performed using  
439 the Quick-RNA MiniPrep kit (Zymo Research #R1054), following the manufacturer's  
440 instructions.

441

442 Total RNA samples for each time point and condition were prepared in three biological  
443 replicates as described above. A NanoDrop One spectrophotometer (Thermo Fisher Scientific)  
444 was used to determine RNA concentration and quality; all samples passed quality assessment.  
445 RNA expression levels for *CTCF*, *STAT1*, and *IFIH1* were quantified using the Luna Universal  
446 One-Step RT-qPCR Kit (New England Biolabs #E3005L) according to the manufacturer's  
447 instructions. In brief, for each reaction 25 ng of RNA was combined with 5ul 2× Luna Universal  
448 One-Step Reaction Mix, 0.5ul 20× Luna WarmStart RT Enzyme Mix, 0.4ul 10uM forward primer,  
449 and 0.4ul 10uM reverse primer. Reactions were amplified using a CFX384 Touch Real-Time

450 PCR Detection System (Bio-Rad) with the following PCR cycling conditions: 10 min at 55°C, 1  
451 min at 95°C, 40x(10 s at 95°C, 30 s at 60°C). On-target amplification was assessed by melt  
452 curve analysis. Two biological replicates were included for each treatment condition, and each  
453 biological replicate was run in technical duplicate. Statistical significance was assessed using a  
454 two-tailed paired Student's t-test with a threshold of  $p\text{-val} < 0.05$ .

455

#### 456 *Transcriptome analyses*

457 Paired-end 150bp read length FASTQ files were quality and adapter trimmed using BBduk  
458 v.38.05 [63]; quality check was performed using FastQC v0.11.8 [64] and inspected through  
459 MultiQC v1.7 [65]. Filtered FASTQ files were then mapped to the myoLuc2\_HiC genome using  
460 a 2-pass approach in STAR v2.7.3a [66]. STAR was run following default parameters and  
461 allowing for multi-mapping reads (with options '`-outAnchorMultimapNmax 100 -`  
462 `winAnchorMultimapNmax 100 -outFilterMultimapNmax 100`'), a requisite for the inclusion of TE-  
463 mapping reads in the output files. The annotation file available on DNAAZoo, here referred to as  
464 "functional annotation"  
465 ([www.dropbox.com/sh/xt300ht42mihjov/AADoENW7RTvR3jTh1a8qUOmRa](http://www.dropbox.com/sh/xt300ht42mihjov/AADoENW7RTvR3jTh1a8qUOmRa)) was used as  
466 reference for the mapping process. For the second pass of mapping we filtered out novel  
467 junctions that mapped to the mitochondrial genome, HiC\_scaffold\_93 based on the most likely  
468 alignment hit to the reference mitochondrial genome performed using LASTZ v1.02.00 [67].  
469 Resulting alignment files in sorted *.bam* format were then provided as input for TE and gene  
470 expression quantification in TETranscripts v2.1.4 [42] using the same gene annotation and our  
471 custom TE annotation derived from RepeatMasker. Pairwise differential expression analyses at  
472 4h and 24h post IFN treatment were performed in DESeq2 v1.32 [68]. Functional enrichment  
473 analyses of differentially expressed genes ( $\text{adj. } p\text{-val} < 0.05$ ,  $\log_2\text{FC} > 1.5$ ) were performed  
474 using the WebGestalt web tool [69].

475  
476 *Genome guided transcriptome assembly and analysis*  
477 Short-read RNA-seq alignment files generated by running STAR (see previous paragraph)  
478 were merged, sorted and indexed using SAMtools v1.10 [70], and the resulting *.bam* file was  
479 used as input for genome guided transcriptome assembly in StringTie v1.3.3b [43]. StringTie  
480 was run following default parameters, except that the minimum number of spliced reads  
481 required to align across a junction was increased from 1 to 5 using option '*-j 5*'. The resulting  
482 StringTie gtf output (Supplementary Data 1) was then converted to FASTA format using the  
483 *gffread* utility using options '*-M, -F, and -Z*' included in Cufflinks v.2.2.1 [71]. We followed an  
484 homology-based approach to annotate assembled StringTie genes and isoforms. StringTie  
485 gene sequences were queried against the SwissProt database [72] through the *blastx* search  
486 algorithm in BLAST 2.12.0+ [73] using options '*-max\_target\_seqs 1 -evaluate 10*'. Matches were  
487 then filtered for shared sequence identity equal to or greater than 50%.  
488  
489 To find transcripts with coding regions that intersect TEs, we applied BEDTools v2.28.0 [74] to  
490 filter for events where at least 50% of the sequence of one exon derived from a TE with option '*-*  
491 *f 0.5*'. Briefly, exon coordinates were extracted from the StringTie annotation and intersected  
492 with our custom TE annotation for *Myotis lucifugus*. To narrow down the list of candidate  
493 StringTie transcripts and limit redundant of false positive matches, the output was filtered for  
494 multi-exon transcripts with a transcripts per million (TPM) value equal to or higher than 0.5. TPM  
495 values were quantified at the isoform level by RSEM v1.3.0 [75]. Filtered StringTie transcript  
496 candidates were cross-referenced against the results of differential expression analysis in  
497 DESeq2 v1.32 [68] (Table S3) to identify TE exonization events in ISGs. Candidates ISGs were  
498 verified by visually inspecting candidates against the DNazoo and NCBI annotations for *Myotis*  
499 *lucifugus* and RNA-seq coverage tracks. To identify TEs that might be contributing to alternative  
500 transcriptional start sites (TSS), we used a custom python script to extract the TSS coordinates

501 from the StringTie annotation and intersected this collapsed file with the TE annotation file as  
502 previously described.  
503  
504 Finally, we queried StringTie-derived assembled transcripts against databases of DNA  
505 transposons and retrotransposons extracted from the Repbase repository of TE reference  
506 sequences [45]. *tblastx* was used according to previously specified parameters and resulting  
507 hits were further filtered for alignments greater than or equal to 300bp with a sequence identity  
508 greater than or equal to 90%. To identify any transcripts with intact protein-coding sequences of  
509 viral origin, we ran *blastx* against i) the gEVE repository of retroviral proteins [76] and ii) a  
510 custom database of syncytin proteins collected from the ncbi repository [77]. The output of  
511 gEVE blast was filtered for alignments greater than or equal to 200bp with a shared sequence  
512 identity greater than or equal to 50%. The output of syncytin blast was filtered for alignments  
513 greater than 100bp with shared sequence identity of 50% and above. The same blast analysis  
514 for TE sequences and protein databases was carried out on identified open reading frames  
515 (ORFs) larger than 50aa found by running the function *usearch* [78] (*usearch -fastx\_findorfs -*  
516 *orfstyle 7 -mincodons 16*) on the StringTie assembled transcripts file.

517

#### 518 *CUT&RUN analysis*

519 Adapters and low quality reads were trimmed using BBDuk v38.05 [63] using options '*ktrim=r*  
520 *k=34 mink=11 hdist=1 tpe tbo qtrim=r trimq=10*'. Trimmed reads were aligned to the  
521 myoLuc2\_HiC assembly using Bowtie 2 v2.2.9 [79] with options '*--local --very-sensitive-local --*  
522 *no-unal --no-mixed --no-discordant -l 10 -X 700*', and only uniquely mapping reads with a  
523 minimum MAPQ of 10 were retained. Fragments aligning to the mitochondrial genome were  
524 removed. Trimmed reads independently aligned to the *S. cerevisiae* assembly  
525 (GCF\_000146045.2) using Bowtie 2 v2.2.9 [79] with options '*--local --very-sensitive-local --no-*

526 *unal --no-mixed --no-discordant --no-overlap --no-dovetail -l 10 -X 700*. myoLuc2\_HiC read  
527 depth was normalized according to the number of fragments aligned to the *S. cerevisiae*  
528 assembly for each sample, and normalized bigWigs corresponding to read coverage per 1  
529 million normalized reads were generated using deepTools v3.0.1 [80,81] for heatmap  
530 visualization.

531  
532 Peak calling was performed using complete and size subsetted alignment files with MACS2  
533 v2.1.1 [82] in a two-step process where separate sets of peaks were called with 1) single-end  
534 options '*--format BAM --shift=-75 --extsize=150*' and 2) paired-end option '*--format BAMPE*'. For  
535 both modes only peaks with an unadjusted *p*-val < 0.01 were retained. Peaks from each mode  
536 were subsequently merged. IgG peaks were subtracted from each pulldown peak set to  
537 minimize background. Only the top 20,000 peaks by descending MACS2 peak score were  
538 retained for further analysis.

539  
540 To identify IFN-inducible CUT&RUN peaks, the top 20,000 peaks for all samples for a particular  
541 pulldown (across all replicates, untreated and IFN-stimulated) were concatenated into a single  
542 list, and aligned fragments from each individual sample were counted for all peaks using  
543 BEDTools v2.28.0 [74]. IFN-inducible peaks were called using DESeq2 v1.26.0 [68], however  
544 we were unable to identify peaks that were significantly upregulated in response to IFN with an  
545 FDR < 0.10. We therefore took a more relaxed approach, retaining all peaks with an unadjusted  
546 *p*-val < 0.10 and log2FC > 0. log2FC values were shrunken using the *apeglm* function v1.8.0  
547 [83] for visualization. Motif analysis was performed using XSTREME v5.4.1 [84] with options '*--*  
548 *minw 6 --maxw 20 --streme-motifs 20 --align center*' querying against the JASPAR CORE 2018  
549 vertebrates database [85].

550

551 To assess the contributions of TEs in regulating the IFN response, we intersected IFN-inducible  
552 H3K27ac peaks with all annotated TEs, requiring that all reported TEs are fully contained within  
553 the peak. We further characterized the regulatory landscape by identifying STAT1-marked TEs  
554 as a function of distance to the nearest ISG (FDR<0.05, log<sub>2</sub>FC>1.5) transcriptional start site  
555 using BEDTools v2.28.0 [74]. To assess family-level enrichment, GIGGLE v0.6.3 [86] was used  
556 to create a database of TEs in the myoLuc2\_HiC genome using the custom TE database as  
557 described above. IFN-inducible H3K27ac peaks were then queried against the TE database.  
558 Results were ranked by descending Giggie enrichment score, and enriched TE families were  
559 identified according to the odds ratio, Fisher's two-tailed *p*-val, and number of overlaps. The TE  
560 heatmaps were prepared by selecting elements within various families that overlapped either  
561 IFN-inducible H3K27ac regions or any H3K27ac regions from untreated or IFN conditions.  
562 Signal from *S. cerevisiae* spike-in, CPM normalized bigwigs was plotted as heatmaps using  
563 deepTools v3.0.1 [80,81].  
564

## 565 REFERENCES

- 566 1. Gorbunova V, Seluanov A, Kennedy BK. The World Goes Bats: Living Longer and Tolerating  
567 Viruses. *Cell Metab.* 2020;32:31–43.
- 568 2. Luis AD, Hayman DTS, O’Shea TJ, Cryan PM, Gilbert AT, Pulliam JRC, et al. A comparison  
569 of bats and rodents as reservoirs of zoonotic viruses: are bats special? *Proc Biol Sci.*  
570 2013;280:20122753.
- 571 3. Schuh AJ, Amman BR, Sealy TK, Spengler JR, Nichol ST, Towner JS. Egyptian rousette bats  
572 maintain long-term protective immunity against Marburg virus infection despite diminished  
573 antibody levels. *Sci Rep.* 2017;7:8763.
- 574 4. Halpin K, Hyatt AD, Fogarty R, Middleton D, Bingham J, Epstein JH, et al. Pteropid bats are  
575 confirmed as the reservoir hosts of henipaviruses: a comprehensive experimental study of virus  
576 transmission. *Am J Trop Med Hyg.* 2011;85:946–51.
- 577 5. Swanepoel R, Leman PA, Burt FJ, Zachariades NA, Braack LE, Ksiazek TG, et al.  
578 Experimental inoculation of plants and animals with Ebola virus. *Emerg Infect Dis.* 1996;2:321–  
579 5.
- 580 6. Munster VJ, Adney DR, van Doremalen N, Brown VR, Miazgowicz KL, Milne-Price S, et al.  
581 Replication and shedding of MERS-CoV in Jamaican fruit bats (*Artibeus jamaicensis*). *Sci Rep.*  
582 2016;6:21878.
- 583 7. Zhou P, Tachedjian M, Wynne JW, Boyd V, Cui J, Smith I, et al. Contraction of the type I IFN  
584 locus and unusual constitutive expression of IFN- $\alpha$  in bats. *Proc Natl Acad Sci U S A.*  
585 2016;113:2696–701.



- 586 8. Shaw AE, Hughes J, Gu Q, Behdenna A, Singer JB, Dennis T, et al. Fundamental properties  
587 of the mammalian innate immune system revealed by multispecies comparison of type I  
588 interferon responses. *PLoS Biol.* 2017;15:e2004086.
- 589 9. De La Cruz-Rivera PC, Kanchwala M, Liang H, Kumar A, Wang L-F, Xing C, et al. The IFN  
590 Response in Bats Displays Distinctive IFN-Stimulated Gene Expression Kinetics with Atypical  
591 RNASEL Induction. *J Immunol.* 2018;200:209–17.
- 592 10. Escalera-Zamudio M, Zepeda-Mendoza ML, Loza-Rubio E, Rojas-Anaya E, Méndez-Ojeda  
593 ML, Arias CF, et al. The evolution of bat nucleic acid-sensing Toll-like receptors. *Mol Ecol.*  
594 2015;24:5899–909.
- 595 11. Ahn M, Cui J, Irving AT, Wang L-F. Unique Loss of the PYHIN Gene Family in Bats  
596 Amongst Mammals: Implications for Inflammasome Sensing. *Sci Rep.* 2016;6:21722.
- 597 12. Ahn M, Anderson DE, Zhang Q, Tan CW, Lim BL, Luko K, et al. Dampened NLRP3-  
598 mediated inflammation in bats and implications for a special viral reservoir host. *Nat Microbiol.*  
599 2019;4:789–99.
- 600 13. Xie J, Li Y, Shen X, Goh G, Zhu Y, Cui J, et al. Dampened STING-Dependent Interferon  
601 Activation in Bats. *Cell Host Microbe.* 2018;23:297–301.e4.
- 602 14. Wickenhagen A, Sugrue E, Lytras S, Kuchi S, Noerenberg M, Turnbull ML, et al. A  
603 prenylated dsRNA sensor protects against severe COVID-19. *Science.* 2021;374:eabj3624.
- 604 15. Frank JA, Feschotte C. Co-option of endogenous viral sequences for host cell function. *Curr*  
605 *Opin Virol.* 2017;25:81–9.

- 606 16. Mura M, Murcia P, Caporale M, Spencer TE, Nagashima K, Rein A, et al. Late viral  
607 interference induced by transdominant Gag of an endogenous retrovirus. *Proc Natl Acad Sci U*  
608 *S A*. 2004;101:11117–22.
- 609 17. Young GR, Yap MW, Michaux JR, Stepan SJ, Stoye JP. Evolutionary journey of the  
610 retroviral restriction gene Fv1. *Proc Natl Acad Sci U S A*. 2018;115:10130–5.
- 611 18. Blanco-Melo D, Gifford RJ, Bieniasz PD. Co-option of an endogenous retrovirus envelope  
612 for host defense in hominid ancestors. *Elife* [Internet]. 2017;6. Available from:  
613 <http://dx.doi.org/10.7554/eLife.22519>
- 614 19. Chiappinelli KB, Strissel PL, Desrichard A, Li H, Henke C, Akman B, et al. Inhibiting DNA  
615 Methylation Causes an Interferon Response in Cancer via dsRNA Including Endogenous  
616 Retroviruses. *Cell*. 2015;162:974–86.
- 617 20. Roulois D, Loo Yau H, Singhania R, Wang Y, Danesh A, Shen SY, et al. DNA-  
618 Demethylating Agents Target Colorectal Cancer Cells by Inducing Viral Mimicry by Endogenous  
619 Transcripts. *Cell*. 2015;162:961–73.
- 620 21. Schmidt N, Domingues P, Golebiowski F, Patzina C, Tatham MH, Hay RT, et al. An  
621 influenza virus-triggered SUMO switch orchestrates co-opted endogenous retroviruses to  
622 stimulate host antiviral immunity. *Proc Natl Acad Sci U S A*. 2019;116:17399–408.
- 623 22. Kelly CJ, Chitko-McKown C, Chuong EB. Ruminant-specific retrotransposons shape  
624 regulatory evolution of bovine immunity [Internet]. *bioRxiv*. 2021 [cited 2022 Feb 25]. p.  
625 2021.10.01.462810. Available from: <https://www.biorxiv.org/content/10.1101/2021.10.01.462810>
- 626 23. Chuong EB, Elde NC, Feschotte C. Regulatory evolution of innate immunity through co-  
627 option of endogenous retroviruses. *Science*. American Association for the Advancement of  
628 Science; 2016;351:1083–7.

- 629 24. Srinivasachar Badarinarayan S, Shcherbakova I, Langer S, Koepke L, Preising A, Hotter D,  
630 et al. HIV-1 infection activates endogenous retroviral promoters regulating antiviral gene  
631 expression. *Nucleic Acids Res.* 2020;48:10890–908.
- 632 25. van de Lagemaat LN, Landry J-R, Mager DL, Medstrand P. Transposable elements in  
633 mammals promote regulatory variation and diversification of genes with specialized functions.  
634 *Trends Genet.* 2003;19:530–6.
- 635 26. Bogdan L, Barreiro L, Bourque G. Transposable elements have contributed human  
636 regulatory regions that are activated upon bacterial infection. *Philos Trans R Soc Lond B Biol*  
637 *Sci.* 2020;375:20190332.
- 638 27. Daugherty MD, Malik HS. Rules of engagement: molecular insights from host-virus arms  
639 races. *Annu Rev Genet. Annual Reviews;* 2012;46:677–700.
- 640 28. Katzourakis A, Aswad A. Evolution: Endogenous Viruses Provide Shortcuts in Antiviral  
641 Immunity. *Curr Biol. Elsevier;* 2016;26:R427–9.
- 642 29. Ray DA, Feschotte C, Pagan HJT, Smith JD, Pritham EJ, Arensburger P, et al. Multiple  
643 waves of recent DNA transposon activity in the bat, *Myotis lucifugus*. *Genome Res.*  
644 2008;18:717–28.
- 645 30. Grabundzija I, Messing SA, Thomas J, Cosby RL, Bilic I, Miskey C, et al. A Helitron  
646 transposon reconstructed from bats reveals a novel mechanism of genome shuffling in  
647 eukaryotes. *Nat Commun.* 2016;7:10716.
- 648 31. Mitra R, Li X, Kapusta A, Mayhew D, Mitra RD, Feschotte C, et al. Functional  
649 characterization of piggyBat from the bat *Myotis lucifugus* unveils an active mammalian DNA  
650 transposon. *Proc Natl Acad Sci U S A.* 2013;110:234–9.

- 651 32. Pritham EJ, Feschotte C. Massive amplification of rolling-circle transposons in the lineage of  
652 the bat *Myotis lucifugus*. *Proc Natl Acad Sci U S A*. 2007;104:1895–900.
- 653 33. Cosby RL, Judd J, Zhang R, Zhong A, Garry N, Pritham EJ, et al. Recurrent evolution of  
654 vertebrate transcription factors by transposase capture. *Science* [Internet]. 2021;371. Available  
655 from: <http://dx.doi.org/10.1126/science.abc6405>
- 656 34. Skirmuntt EC, Escalera-Zamudio M, Teeling EC, Smith A, Katzourakis A. The Potential Role  
657 of Endogenous Viral Elements in the Evolution of Bats as Reservoirs for Zoonotic Viruses.  
658 *Annual Reviews*; 2020 [cited 2022 Feb 9]; Available from:  
659 <https://www.annualreviews.org/doi/abs/10.1146/annurev-virology-092818-015613>
- 660 35. Skirmuntt EC, Katzourakis A. The evolution of endogenous retroviral envelope genes in bats  
661 and their potential contribution to host biology. *Virus Res*. 2019;270:197645.
- 662 36. Dudchenko O, Batra SS, Omer AD, Nyquist SK, Hoeger M, Durand NC, et al. De novo  
663 assembly of the *Aedes aegypti* genome using Hi-C yields chromosome-length scaffolds.  
664 *Science*. 2017;356:92–5.
- 665 37. Flynn JM, Hubley R, Goubert C, Rosen J, Clark AG, Feschotte C, et al. RepeatModeler2 for  
666 automated genomic discovery of transposable element families. *Proc Natl Acad Sci U S A*.  
667 2020;117:9451–7.
- 668 38. Xiong W, He L, Lai J, Dooner HK, Du C. HelitronScanner uncovers a large overlooked  
669 cache of Helitron transposons in many plant genomes. *Proc Natl Acad Sci U S A*.  
670 2014;111:10263–8.
- 671 39. Tempel S. Using and understanding RepeatMasker. *Methods Mol Biol*. 2012;859:29–51.

- 672 40. RepeatMasker Home Page [Internet]. [cited 2022 Apr 12]. Available from:  
673 <http://www.repeatmasker.org>
- 674 41. Ray DA, Pagan HJT, Thompson ML, Stevens RD. Bats with hATs: evidence for recent DNA  
675 transposon activity in genus *Myotis*. *Mol Biol Evol.* 2007;24:632–9.
- 676 42. Jin Y, Tam OH, Paniagua E, Hammell M. TETranscripts: a package for including  
677 transposable elements in differential expression analysis of RNA-seq datasets. *Bioinformatics.*  
678 2015;31:3593–9.
- 679 43. Kovaka S, Zimin AV, Pertea GM, Razaghi R, Salzberg SL, Pertea M. Transcriptome  
680 assembly from long-read RNA-seq alignments with StringTie2. *Genome Biol.* 2019;20:278.
- 681 44. Böhne A, Zhou Q, Darras A, Schmidt C, Scharl M, Galiana-Arnoux D, et al. Zisupton—A  
682 Novel Superfamily of DNA Transposable Elements Recently Active in Fish. *Mol Biol Evol.*  
683 *Oxford Academic*; 2011;29:631–45.
- 684 45. Bao W, Kojima KK, Kohany O. Repbase Update, a database of repetitive elements in  
685 eukaryotic genomes. *Mob DNA.* 2015;6:11.
- 686 46. Mi S, Lee X, Li X, Veldman GM, Finnerty H, Racie L, et al. Syncytin is a captive retroviral  
687 envelope protein involved in human placental morphogenesis. *Nature.* 2000;403:785–9.
- 688 47. Horie M, Kobayashi Y, Honda T, Fujino K, Akasaka T, Kohl C, et al. An RNA-dependent  
689 RNA polymerase gene in bat genomes derived from an ancient negative-strand RNA virus. *Sci*  
690 *Rep.* 2016;6:25873.
- 691 48. Zhang G, Cowled C, Shi Z, Huang Z, Bishop-Lilly KA, Fang X, et al. Comparative analysis of  
692 bat genomes provides insight into the evolution of flight and immunity. *Science.* 2013;339:456–  
693 60.

- 694 49. Pavlovich SS, Lovett SP, Koroleva G, Guito JC, Arnold CE, Nagle ER, et al. The Egyptian  
695 Roussette Genome Reveals Unexpected Features of Bat Antiviral Immunity. *Cell*.  
696 2018;173:1098–110.e18.
- 697 50. Chuong EB, Elde NC, Feschotte C. Regulatory evolution of innate immunity through co-  
698 option of endogenous retroviruses. *Science*. 2016;351:1083–7.
- 699 51. Kobayashi KS, van den Elsen PJ. NLRC5: a key regulator of MHC class I-dependent  
700 immune responses. *Nat Rev Immunol*. 2012;12:813–20.
- 701 52. Benkő S, Kovács EG, Hezel F, Kufer TA. NLRC5 Functions beyond MHC I Regulation-What  
702 Do We Know So Far? *Front Immunol*. 2017;8:150.
- 703 53. Ostuni R, Piccolo V, Barozzi I, Polletti S, Termanini A, Bonifacio S, et al. Latent enhancers  
704 activated by stimulation in differentiated cells. *Cell*. Elsevier; 2013;152:157–71.
- 705 54. Qiao Y, Giannopoulou EG, Chan CH, Park S-H, Gong S, Chen J, et al. Synergistic  
706 activation of inflammatory cytokine genes by interferon- $\gamma$ -induced chromatin remodeling and toll-  
707 like receptor signaling. *Immunity*. 2013;39:454–69.
- 708 55. Bondet V, Le Baut M, Le Poder S, Lécu A, Petit T, Wedlarski R, et al. Constitutive IFN $\alpha$   
709 Protein Production in Bats. *Front Immunol*. 2021;12:735866.
- 710 56. Kepler TB, Sample C, Hudak K, Roach J, Haines A, Walsh A, et al. Chiropteran types I and  
711 II interferon genes inferred from genome sequencing traces by a statistical gene-family  
712 assembler. *BMC Genomics*. 2010;11:444.
- 713 57. Lindblad-Toh K, Garber M, Zuk O, Lin MF, Parker BJ, Washietl S, et al. A high-resolution  
714 map of human evolutionary constraint using 29 mammals. *Nature*. 2011;478:476–82.

- 715 58. Dudchenko O, Shamim MS, Batra SS, Durand NC, Musial NT, Mostofa R, et al. The  
716 Juicebox Assembly Tools module facilitates de novo assembly of mammalian genomes with  
717 chromosome-length scaffolds for under \$1000 [Internet]. bioRxiv. 2018 [cited 2022 Apr 18]. p.  
718 254797. Available from: <https://www.biorxiv.org/content/10.1101/254797v1>
- 719 59. Belton J-M, McCord RP, Gibcus JH, Naumova N, Zhan Y, Dekker J. Hi-C: a comprehensive  
720 technique to capture the conformation of genomes. *Methods*. 2012;58:268–76.
- 721 60. Pasquesi GIM, Adams RH, Card DC, Schield DR, Corbin AB, Perry BW, et al. Squamate  
722 reptiles challenge paradigms of genomic repeat element evolution set by birds and mammals.  
723 *Nat Commun*. 2018;9:2774.
- 724 61. Janssens D, Henikoff S. CUT&RUN: Targeted in situ genome-wide profiling with high  
725 efficiency for low cell numbers v3 [Internet]. protocols.io. ZappyLab, Inc.; 2019. Available from:  
726 <https://www.protocols.io/view/cut-amp-run-targeted-in-situ-genome-wide-profiling-zcpf2vn>
- 727 62. Meers MP, Bryson TD, Henikoff JG, Henikoff S. Improved CUT&RUN chromatin profiling  
728 tools. *Elife* [Internet]. 2019;8. Available from: <http://dx.doi.org/10.7554/eLife.46314>
- 729 63. BBMap [Internet]. SourceForge. [cited 2022 Apr 18]. Available from:  
730 <https://www.sourceforge.net/projects/bbmap/>
- 731 64. Babraham bioinformatics - FastQC A quality control tool for high throughput sequence data  
732 [Internet]. [cited 2022 Apr 18]. Available from:  
733 <https://www.bioinformatics.babraham.ac.uk/projects/fastqc/>
- 734 65. Ewels P, Magnusson M, Lundin S, Källér M. MultiQC: summarize analysis results for  
735 multiple tools and samples in a single report. *Bioinformatics*. 2016;32:3047–8.

- 736 66. Dobin A, Davis CA, Schlesinger F, Drenkow J, Zaleski C, Jha S, et al. STAR: ultrafast  
737 universal RNA-seq aligner. *Bioinformatics*. 2013;29:15–21.
- 738 67. CCGB: Miller Lab, LASTZ [Internet]. [cited 2022 Feb 20]. Available from:  
739 <https://www.bx.psu.edu/~rsharris/lastz/>
- 740 68. Love MI, Huber W, Anders S. Moderated estimation of fold change and dispersion for RNA-  
741 seq data with DESeq2. *Genome Biol*. 2014;15:550.
- 742 69. Liao Y, Wang J, Jaehnig EJ, Shi Z, Zhang B. WebGestalt 2019: gene set analysis toolkit  
743 with revamped UIs and APIs. *Nucleic Acids Res*. 2019;47:W199–205.
- 744 70. Li H, Handsaker B, Wysoker A, Fennell T, Ruan J, Homer N, et al. The Sequence  
745 Alignment/Map format and SAMtools. *Bioinformatics*. 2009;25:2078–9.
- 746 71. Pertea G, Pertea M. GFF Utilities: GffRead and GffCompare. *F1000Res* [Internet]. 2020;9.  
747 Available from: <http://dx.doi.org/10.12688/f1000research.23297.2>
- 748 72. Bairoch A, Apweiler R. The SWISS-PROT protein sequence database and its supplement  
749 TrEMBL in 2000. *Nucleic Acids Res*. 2000;28:45–8.
- 750 73. Camacho C, Coulouris G, Avagyan V, Ma N, Papadopoulos J, Bealer K, et al. BLAST+:  
751 architecture and applications. *BMC Bioinformatics*. 2009;10:421.
- 752 74. Quinlan AR, Hall IM. BEDTools: a flexible suite of utilities for comparing genomic features.  
753 *Bioinformatics*. 2010;26:841–2.
- 754 75. Li B, Dewey CN. RSEM: accurate transcript quantification from RNA-Seq data with or  
755 without a reference genome. *BMC Bioinformatics*. 2011;12:323.



- 756 76. Nakagawa S, Takahashi MU. gEVE: a genome-based endogenous viral element database  
757 provides comprehensive viral protein-coding sequences in mammalian genomes. Database  
758 [Internet]. 2016;2016. Available from: <http://dx.doi.org/10.1093/database/baw087>
- 759 77. Sayers EW, Bolton EE, Brister JR, Canese K, Chan J, Comeau DC, et al. Database  
760 resources of the national center for biotechnology information. *Nucleic Acids Res.*  
761 2022;50:D20–6.
- 762 78. Edgar RC. Search and clustering orders of magnitude faster than BLAST. *Bioinformatics.*  
763 2010;26:2460–1.
- 764 79. Langmead B, Salzberg SL. Fast gapped-read alignment with Bowtie 2. *Nat Methods.*  
765 2012;9:357–9.
- 766 80. Ramírez F, Dünder F, Diehl S, Grüning BA, Manke T. deepTools: a flexible platform for  
767 exploring deep-sequencing data. *Nucleic Acids Res.* 2014;42:W187–91.
- 768 81. Ramírez F, Ryan DP, Grüning B, Bhardwaj V, Kilpert F, Richter AS, et al. deepTools2: a  
769 next generation web server for deep-sequencing data analysis. *Nucleic Acids Res.*  
770 2016;44:W160–5.
- 771 82. Liu T. Use Model-Based Analysis of CHIP-Seq (MACS) to Analyze Short Reads Generated  
772 by Sequencing Protein–DNA Interactions in Embryonic Stem Cells. In: Kidder BL, editor. *Stem*  
773 *Cell Transcriptional Networks: Methods and Protocols.* New York, NY: Springer New York;  
774 2014. p. 81–95.
- 775 83. Zhu A, Ibrahim JG, Love MI. Heavy-tailed prior distributions for sequence count data:  
776 removing the noise and preserving large differences. *Bioinformatics.* 2019;35:2084–92.

- 777 84. Grant CE, Bailey TL. XSTREME: Comprehensive motif analysis of biological sequence  
778 datasets [Internet]. bioRxiv. 2021 [cited 2021 Sep 24]. p. 2021.09.02.458722. Available from:  
779 <https://www.biorxiv.org/content/10.1101/2021.09.02.458722v1>
- 780 85. Fornes O, Castro-Mondragon JA, Khan A, van der Lee R, Zhang X, Richmond PA, et al.  
781 JASPAR 2020: update of the open-access database of transcription factor binding profiles.  
782 Nucleic Acids Res. 2020;48:D87–92.
- 783 86. Layer RM, Pedersen BS, DiSera T, Marth GT, Gertz J, Quinlan AR. GIGGLE: a search  
784 engine for large-scale integrated genome analysis. Nat Methods. 2018;15:123–6.
- 785

786 **DECLARATIONS**

787 *Ethics approval and consent to participate*

788 Not applicable.

789

790 *Consent for publication*

791 Not applicable.

792

793 *Availability of data and materials*

794 Newly generated RNAseq and CUT&RUN raw files have been deposited under the GEO

795 SuperSeries accession GSE200833. Processed data, including TE annotation, can be

796 visualized as a UCSC genome browser custom track here:

797 [https://genome.ucsc.edu/s/GiuliaPasquesi/myoLuc2\\_HiC](https://genome.ucsc.edu/s/GiuliaPasquesi/myoLuc2_HiC).

798

799 *Competing interests*

800 The authors declare that they have no competing interests.

801

802 *Funding*

803 This study was supported by xxx.

804

805 *Authors' contributions*

806 EC and GP designed the study. GP and CK performed experiments. GP, CK, AO and EC

807 analyzed data and interpreted results. GP and CK created and edited figures and tables. EC,

808 GP and CK wrote the manuscript with input from all co-authors. All authors gave final approval

809 for publication.

810

811 *Acknowledgements*

812 Unpublished genome assemblies are used with permission from the DNA Zoo Consortium  
813 (dnazoo.org). *Myotis lucifugus* primary embryonic fibroblast cells were a kind gift of Mario  
814 Capecchi (University of Utah). We thank the BioFrontiers Computing core for technical support  
815 during this study.

816

817 FIGURES

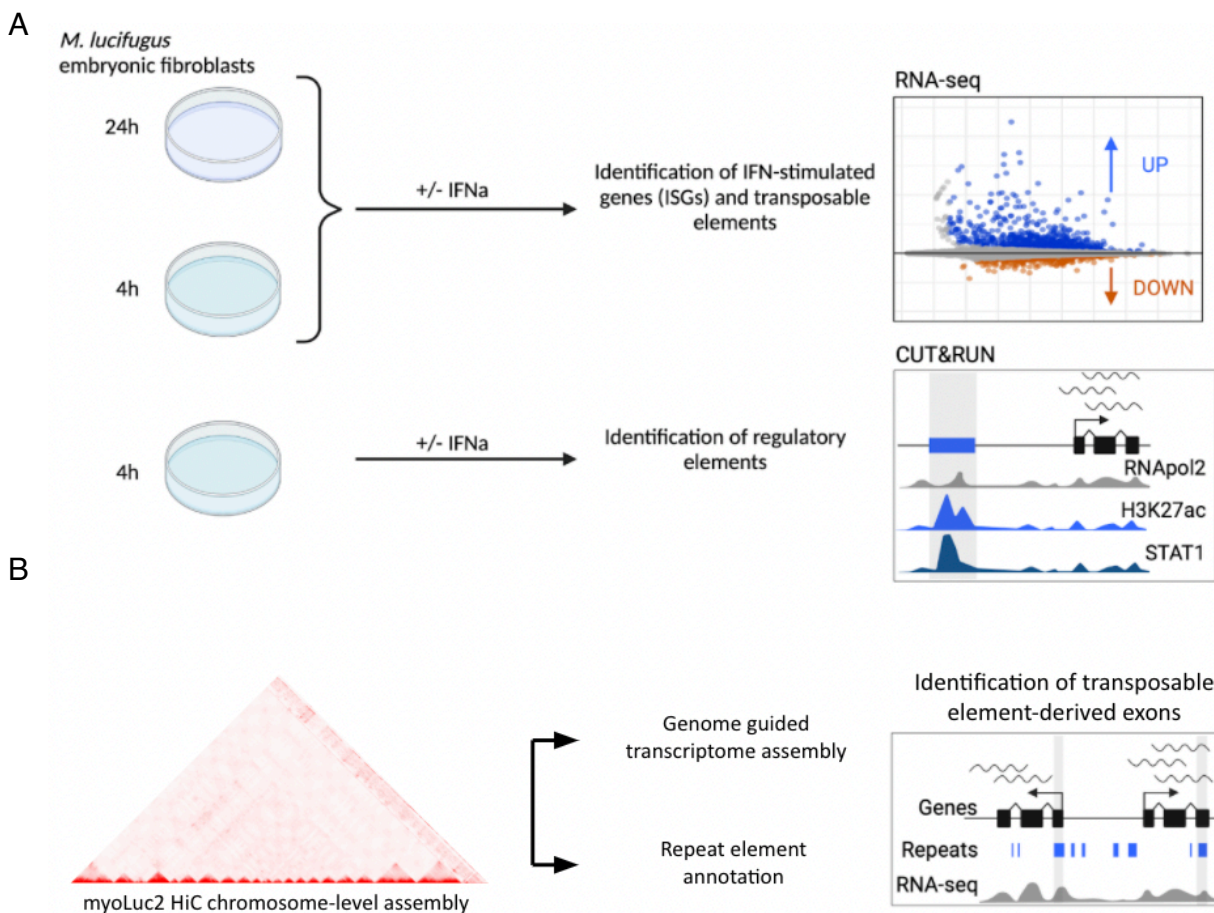

818

819 **Fig. 1 - Experimental design.** **A)** *Myotis lucifugus* embryonic fibroblast primary cells were treated for 24  
 820 hours (24h) and for 4 hours (4h) with 1000U/ml of universal IFNa (+IFNa) or matched volume of DPBS (-  
 821 IFNa). Total RNA at both time points was extracted and used as input for RNA library preparation and  
 822 sequencing to identify differentially expressed genes and transposable elements (TEs). To characterize  
 823 changes in chromatin accessibility upon IFN treatment, cells were similarly treated for 4h, and subjected  
 824 to the CUT&RUN protocol on H3K27ac, POLR2A, and STAT1. **B)** The chromosome-level genome  
 825 assembly for *Myotis lucifugus* was used as reference to perform *de novo* repeat element identification  
 826 and annotation. Combined with genome guided transcriptome assembly of our RNA-seq datasets, the  
 827 custom repeat element annotation was used to identify TE-derived and virus-derived isoforms and  
 828 transcription start sites (TSS).  
 829

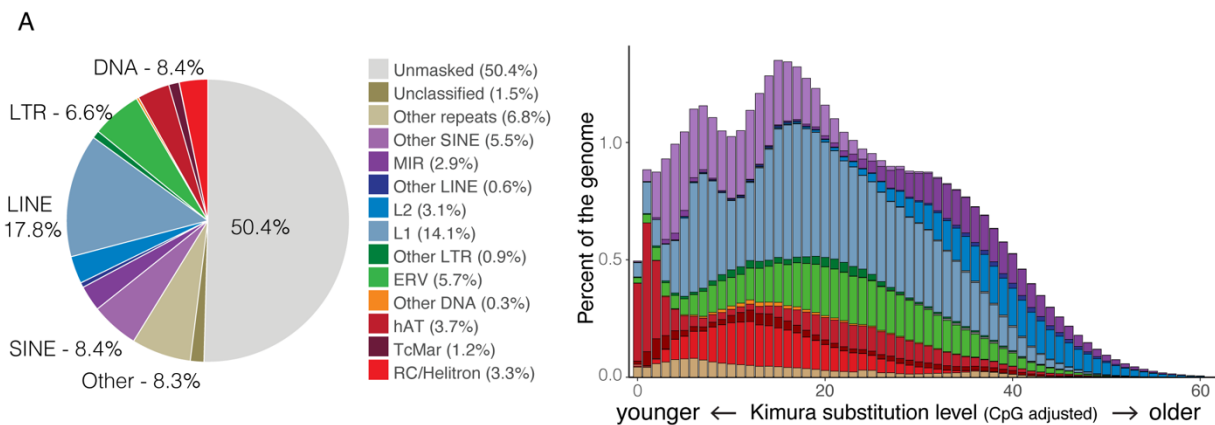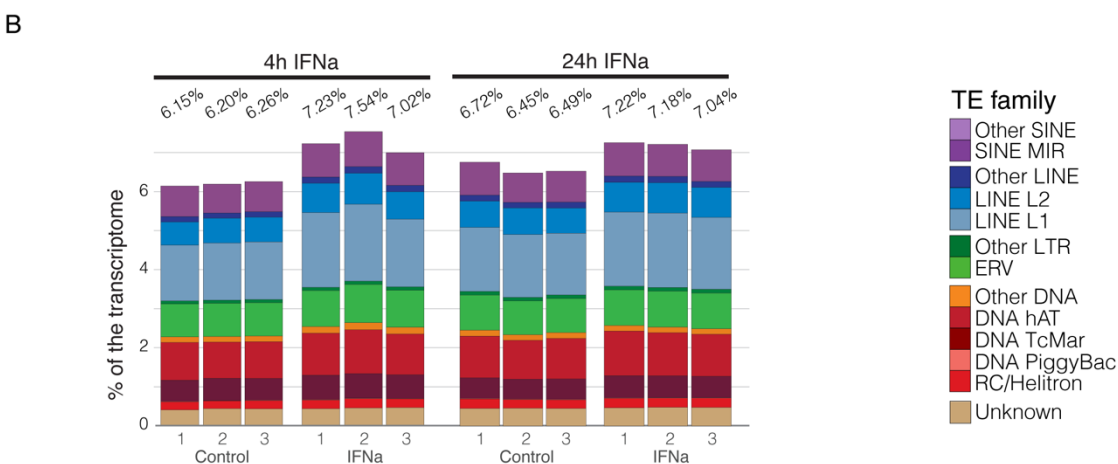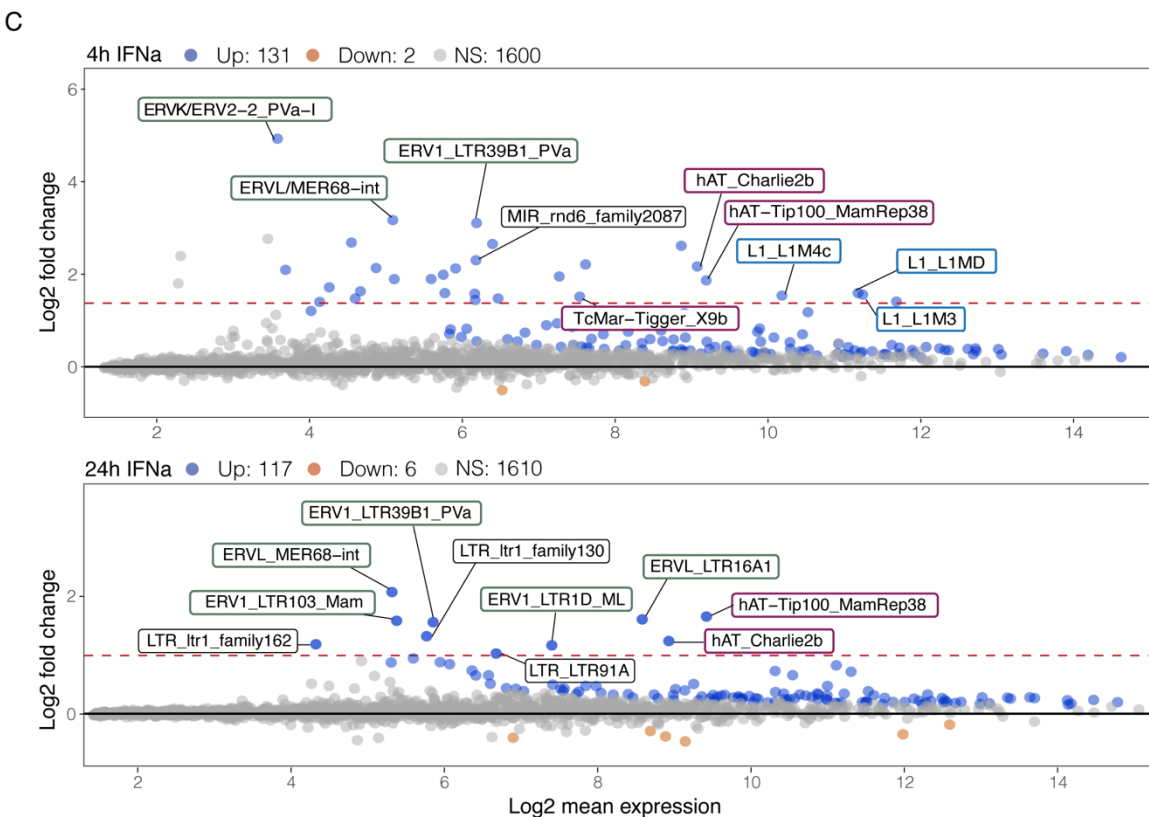

831 **Fig. 2 - Repeat element composition, evolutionary dynamics and transcriptional profiles.** Repeat  
832 elements were annotated by combining *de novo* identification and homology-based searches. **A)** Pie  
833 chart shows the relative abundance of main TE families (42.7% total) as percentage of the genome;  
834 histogram shows the composition as percentage of the genome of major TE superfamilies as a function of  
835 the divergence (Kimura2Distance) from the reference consensus sequence of each TE. Given the  
836 correlation between divergence from the consensus and time of transposition, the lower the K2D (left)  
837 and the younger a TE is. As previously identified in Myotis and other bat species, we recovered recent  
838 expansion and activity of multiple DNA elements, in particular Helitrons and more recently hAT elements.  
839 **B)** Histograms show expression levels of major TE families as a fraction (%) of normalized read counts  
840 from RNA sequencing data of IFN $\alpha$ -stimulated and unstimulated cells at 4h and 24h post treatment. **C)**  
841 MAplots of apeglm [83] transformed data show differentially expressed TEs at 4h (top) and 24h (bottom)  
842 post IFN treatment. For the 4h time point, only the top three TEs per family with the highest Log2 fold  
843 change were labelled. For both time points, only TEs that met a threshold of adjusted p-value < 0.05 and  
844 log2 fold change > 1.5 (accepted fdr = 0.05) were labelled. Counts of upregulated (blue dots) and  
845 downregulated (orange dots) TEs are based on adjusted p-value (<0.05; accepted fdr = 0.05) only.  
846 Among induced TEs at 4h (45 total based on our cutoffs) we recovered for the most part ERV  
847 retrotransposons (green outline), DNA hAT transposons (red outline) and L1 LINEs (light blue outline). At  
848 24h post treatment we only found 10 families that met the filtering criteria, for the majority ERV shared  
849 with the 4h dataset.  
850

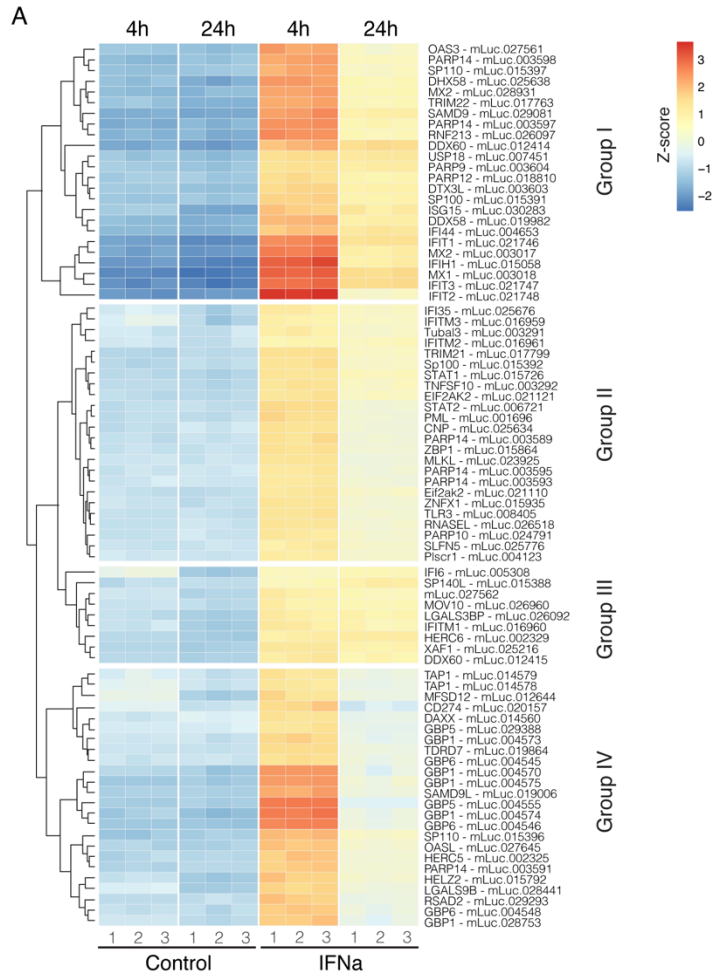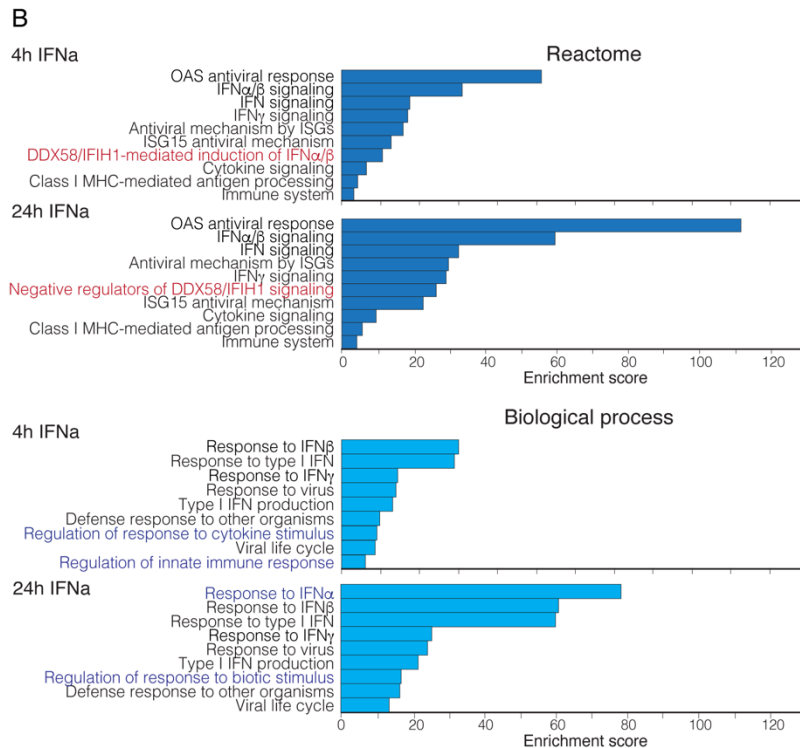



852 **Fig. 3 - Gene expression profiles and enrichment analyses. A)** Heatmap shows the 140 genes with  
853 highest expression variance across samples in vsd transformed data (clustering method: “euclidean”).  
854 Embryonic fibroblast cells presented four different profiles of gene induction dynamics through time: i)  
855 genes with rapid induction and decline at 24h (Group I); ii) genes with mild induction at 4h and low decline  
856 at 24h or with stable induction (Groups II and III); and iii) genes with rapid induction at 4h and rapid  
857 decline (Group IV). **B)** Bar graphs show the results of functional overrepresentation analysis (ORA) on  
858 differentially expressed genes at 4h and 24h post IFN $\alpha$  treatment. Although most terms are shared  
859 between the two time points, we found the DDX58/IFIH1 pathway to be active at 4h post IFN $\alpha$  stimulation,  
860 whereas it is subject to negative regulation at 24h. Similarly, the response to cytokine stimuli is present at  
861 4h post treatment, but not at 24h.  
862

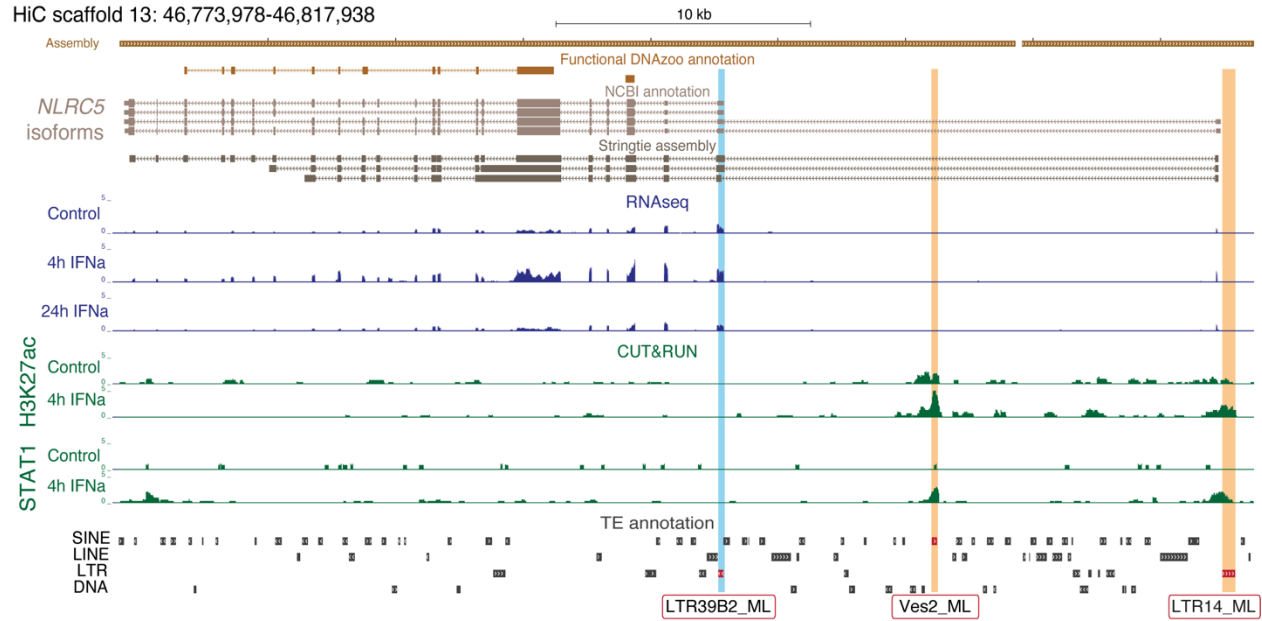

863  
864  
865  
866  
867  
868  
869  
870  
871  
872  
873  
874

**Fig. 4 - TE exonization events in *Myotis* ISGs.** Custom UCSC genome browser screenshot of the NLRC5 locus, where one exon (light blue highlight) represents a potential alternative transcription start site (TSS) deriving from a Myotis-specific LTR39B2\_ML retrotransposons. RNAseq coverage at the promoter region suggests upregulation of the transcript at 4h post IFNa treatment, consistent with its role in immune responses, and lower expression in 24h post treatment samples compared to unstimulated cells. We also identified 2 potential TE-derived regulatory elements (orange highlight) in intronic or upstream regions of the NLRC5 locus that show increase in H3K27ac and STAT1 CUT&RUN signal at 4h post IFNa treatment.

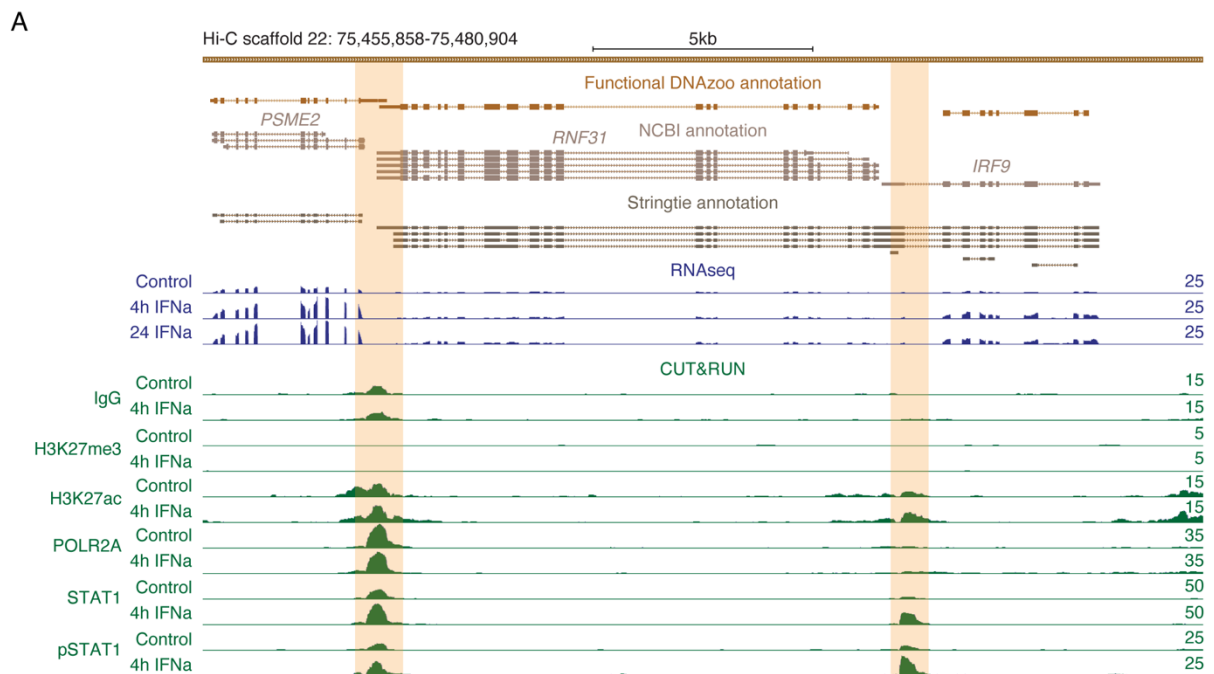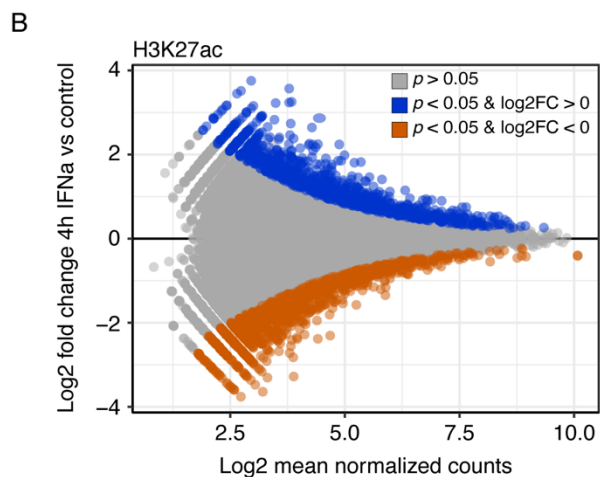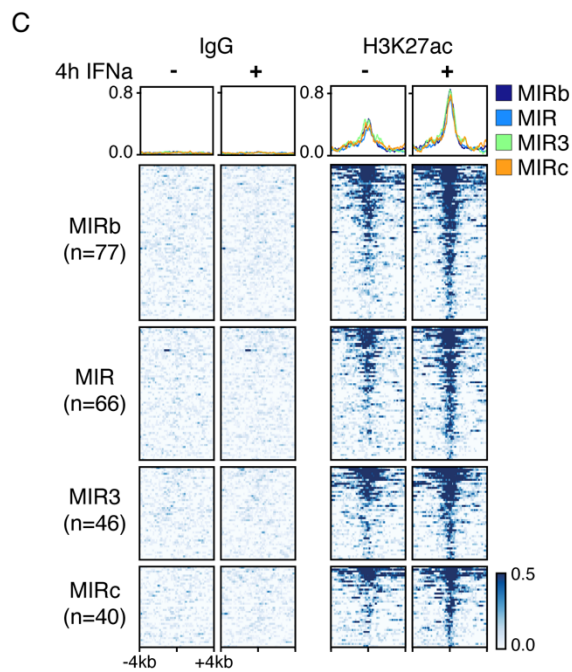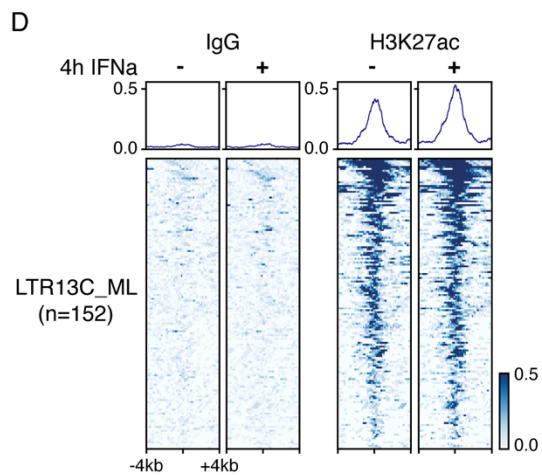

876 **Fig. 5 - Epigenomic profiling of untreated and IFN $\alpha$ -stimulated embryonic fibroblast primary cells.**  
877 **A)** Genome browser view of the *IRF9* and *PSME2* loci. RNA-seq and CUT&RUN tracks are normalized  
878 per million reads. Signal track maxima are indicated on the right of each track. IFN $\alpha$ -inducible ( $p$ -val <  
879 0.10, log<sub>2</sub>FC > 0) STAT1 peaks are highlighted orange. **B)** MA plot of IFN $\alpha$ -inducible (unadjusted  $p$ -val <  
880 0.10, log<sub>2</sub>FC > 0, blue) and IFN $\alpha$ -repressed (unadjusted  $p$ -val < 0.10, log<sub>2</sub>FC < 0, orange) H3K27ac  
881 regions from H3K27ac CUT&RUN. Regions with an unadjusted  $p$ -val > 0.10 are shown in grey. Log<sub>2</sub> fold  
882 change values were shrunken using the apegglm function v1.8.0 [83]. **C)** Heatmaps showing normalized  
883 CUT&RUN signal (signal per million reads) over IFN $\alpha$ -inducible (unadjusted  $p$ -val < 0.10), H3K27ac-  
884 marked MIR families. **D)** Heatmaps showing normalized CUT&RUN signal (signal per million reads) over  
885 H3K27ac-marked LTR13C\_ML families.  
886

887 TABLES  
888

|        | TE ID and Location |                                      |
|--------|--------------------|--------------------------------------|
| Gene   | TE                 | Location                             |
| PARP9  | L1_Canid           | Exon                                 |
| GBP1   | L1M5               | 3'UTR                                |
| DDX60  | MER92B             | 3'UTR                                |
| NLRC5  | Multiple (3 TEs)   | Alternative TSS, regulatory elements |
| CS012  | LTR10A_ML          | 3'UTR                                |
| XAF1   | L1MD               | 3'UTR                                |
| SLFN5  | Ves                | E2 (5'UTR)                           |
| IFITM2 | LTR1D_ML           | 3'UTR                                |
| PLAT3  | Ves2_ML            | Last Exon + 3'UTR                    |
| PLAT3  | MLT1M              | E2                                   |
| SP140L | L1-2a_EF           | E7 - 3'UTR                           |
| SP140L | LTR18C_ML          | E6 - 3'UTR                           |

889  
890 **Table 1 - List of candidate genes with TE-derived exons.**

891 Transposable element (TE) exonization events were predicted by intersecting coordinates of annotated  
892 TEs and de-novo transcriptome assembly of RNA-seq data for *Myotis lucifugus*. Each candidate was  
893 inspected in our custom UCSC genome browser track  
894 ([https://genome.ucsc.edu/s/GiuliaPasquesi/myoLuc2\\_HiC](https://genome.ucsc.edu/s/GiuliaPasquesi/myoLuc2_HiC)) and selected if it showed multiple lines of  
895 support (RNA expression, chromatin profile, additional gene/isoform annotation).

896  
897
